# Supplementary material for: Sequencing and characterization of the complete mitochondrial genome of Japanese Swellshark (Cephalloscyllium umbratile)
Source: PubMed Central journal article supplement (PMC5681689; doi:10.1038/s41598-017-15702-0), 2017-11-10
Supplement: 41598_2017_15702_MOESM1_ESM.pdf [file 41598_2017_15702_MOESM1_ESM.pdf]

Title page

Sequencing and characterization of the complete mitochondrial genome of Japanese Swellshark (*Cephalloscyllium umbratile*)

Ke-Cheng Zhu <sup>1,2,3</sup>, Yin-Yin Liang <sup>1</sup>, Na Wu <sup>1</sup>, Hua-Yang Guo <sup>1,2</sup>, Nan Zhang <sup>1,2</sup>, Shi-Gui Jiang <sup>1,2,4</sup> & Dian-Chang Zhang <sup>1,2,3\*</sup>

<sup>1</sup>Key Laboratory of South China Sea Fishery Resources Exploitation and Utilization, Ministry of Agriculture, South China Sea Fisheries Research Institute, Chinese Academy of Fishery Sciences, 231 Xingang Road West, Haizhu District, Guangzhou 510300, China;

<sup>2</sup>Engineer Technology Research Center of Marine Biological Seed of Guangdong Province, Guangzhou, Guangdong Province, The People's Republic of China;

<sup>3</sup>Key Laboratory of Fishery Ecology & Environment, Guangdong Province;

<sup>4</sup>South China Sea Bio-Resource Exploitation and Utilization Collaborative Innovation Center.

\*Corresponding author:

Dr. Dian C. Zhang

231 Xingang Road West, Haizhu District, Guangzhou City, Guangdong 510300, PR China.

E-mail address: zhangdch@scsfri.ac.cn

Tel.: +86 02089108316; fax: +86 02089022702

1 **Supplementary table 1**

| Superfamily     | Genera                      | Species                              | Size (bp)                | Genbank No. | Identity (%) |    |
|-----------------|-----------------------------|--------------------------------------|--------------------------|-------------|--------------|----|
| Scyliorhinidae  | Cephaloscyllium             | <i>Cephaloscyllium umbratile</i>     | 16896                    | KX354996    | 100          |    |
|                 | Scyliorhinus                | <i>Scyliorhinus canicula</i>         | 16697                    | Y16067.1    | 88           |    |
| Proscylliidae   | Proscyllium                 | <i>Proscyllium habereri</i>          | 16708                    | NC030216    | 84           |    |
| Pseudotriakidae | Pseudotriakis               | <i>Pseudotriakis microdon</i>        | 16700                    | NC022735    | 84           |    |
| Carcharhinidae  | Sphyrna                     | <i>Sphyrna tiburo</i>                | 16723                    | KM453976    | 83           |    |
|                 |                             | <i>Sphyrna lewini</i>                | 16726                    | NC022679    | 83           |    |
|                 | Carcharhinus                | <i>Carcharhinus acronotus</i>        | 16719                    | NC024055    | 83           |    |
|                 |                             | <i>Carcharhinus amblyrhynchoides</i> | 16705                    | NC023948    | 83           |    |
|                 |                             | <i>Carcharhinus amboinensis</i>      | 16704                    | NC026696    | 83           |    |
|                 |                             | <i>Carcharhinus brevipinna</i>       | 16706                    | NC027081    | 83           |    |
|                 |                             | <i>Carcharhinus leucas</i>           | 16704                    | NC023522    | 83           |    |
|                 |                             | <i>Carcharhinus longimanus</i>       | 16706                    | NC025520    | 83           |    |
|                 |                             | <i>Carcharhinus macloti</i>          | 16701                    | NC024862    | 83           |    |
|                 |                             | <i>Carcharhinus melanopterus</i>     | 16706                    | NC024284    | 83           |    |
|                 |                             | <i>Carcharhinus plumbeus</i>         | 16706                    | NC024596    | 83           |    |
|                 |                             | <i>Carcharhinus sorrah</i>           | 16707                    | NC023521    | 83           |    |
|                 |                             | Triaenodon                           | <i>Triaenodon obesus</i> | 16700       | NC026287     | 83 |
|                 |                             | Glyphis                              | <i>Glyphis glyphis</i>   | 16701       | NC021768     | 83 |
|                 |                             |                                      | <i>Glyphis garricki</i>  | 16702       | KF646786     | 83 |
| Prionace        | <i>Prionace glauca</i>      | 16705                                | NC022819                 | 83          |              |    |
| Lamiopsis       | <i>Lamiopsis tephrodes</i>  | 16705                                | KT698047                 | 83          |              |    |
| Loxodon         | <i>Loxodon macrorhinus</i>  | 16702                                | NC029843                 | 83          |              |    |
| Scoliodon       | <i>Scoliodon laticaudus</i> | 16695                                | KP336547                 | 82          |              |    |
| Hemigaleidae    | Hemigaleus                  | <i>Hemigaleus microstoma</i>         | 16701                    | NC029400    | 82           |    |
|                 |                             | <i>Hemipristis elongata</i>          | 16691                    | KU508621    | 82           |    |

2

3 **Supplementary table 2**

4 Primers used to verify the accuracy of the assembled mitochondrial genome sequence.

| Name | Primer sequences (5'-3') | Product length (bp) | Tm (°C) |
|------|--------------------------|---------------------|---------|
| CuF1 | ATGGCACTGAAGATGCTAAGATG  | 5126                | 53      |
| CuR1 | AGCTTTGAAGGCTTTTGGTCT    |                     |         |
| CuF2 | CACTTTGATAGAGTGGATAATGA  | 4945                | 53      |
| CuR2 | ATGTGCTTGGTGAGCCATTATAC  |                     |         |
| CuF3 | TGAAATTGACCATGATTATAAGCT | 4992                | 52      |
| CuR3 | AATGGTATACCTGTGAGGGCTA   |                     |         |
| CuF4 | CTTGGTGCAACTCCAAGCAAG    | 5064                | 57      |
| CuR4 | TCGTATAACCGCGGTGGCTGGCA  |                     |         |

5

6
